# Supplementary material for: Identification and Characterization of Glutathione S-transferase Genes in Spodoptera frugiperda (Lepidoptera: Noctuidae) under Insecticides Stress
Source: MDPI journal article supplement (doi:10.3390/toxics11060542), 2023-06-19
Supplement: s1 [file s1]

Table S1. Primer sequences of qRT-PCR.

| Gene ID         | Primer |                         | Length (bp) | Tm. | Product size |
|-----------------|--------|-------------------------|-------------|-----|--------------|
| <i>SfGSTd1</i>  | F      | CAGTTAGACGAGGCCCTTGG    | 20          | 60  | 83           |
|                 | R      | TCGGCGATGGTGAGATTGTC    | 20          | 60  |              |
| <i>SfGSTd2</i>  | F      | AGGTGCAATAAGTGCTCAGTA   | 21          | 60  | 107          |
|                 | R      | GGAAGCCAAATAGAGTGCAAACA | 23          | 60  |              |
| <i>SfGSTe1</i>  | F      | AACGGGCCATTGTAGACCAG    | 20          | 60  | 177          |
|                 | R      | CAAGCCAGGGTCCAGAGAAG    | 20          | 60  |              |
| <i>SfGSTe2</i>  | F      | ATGGTGAGACGGCATT CAGG   | 20          | 60  | 88           |
|                 | R      | AGCCAGGGTCCAGAGAAGAA    | 20          | 60  |              |
| <i>SfGSTe3</i>  | F      | GATTCAACGCGAACACTTCA    | 20          | 60  | 230          |
|                 | R      | TTTTCAATGCTGCGAAGAGA    | 20          | 60  |              |
| <i>SfGSTe4</i>  | F      | GCAATCTCTGGTCACAGCAA    | 20          | 60  | 242          |
|                 | R      | GGCTCCGGGGATATATCAAT    | 20          | 60  |              |
| <i>SfGSTe6</i>  | F      | CCCGGACTACCTGAAGTTGA    | 20          | 60  | 199          |
|                 | R      | GAGTATCCCGGTGTCGAAGA    | 20          | 60  |              |
| <i>SfGSTe7</i>  | F      | ATGCTTGGCCTACAAATGGA    | 20          | 60  | 150          |
|                 | R      | CTTCATTATGGCGTGGCTTT    | 20          | 60  |              |
| <i>SfGSTe8</i>  | F      | CGTCGGCATATTCTTCATCA    | 20          | 60  | 231          |
|                 | R      | AGATTTTCTGGGGACCTCGT    | 20          | 60  |              |
| <i>SfGSTe9</i>  | F      | ACAGGACAGCCATGCAATCA    | 20          | 60  | 289          |
|                 | R      | CGATATGTCGGCCAAGGTCA    | 20          | 60  |              |
| <i>SfGSTe10</i> | F      | AGAAGCCATTGGTTTTGTGG    | 20          | 60  | 162          |
|                 | R      | TCTAACCAGGCAACCGTCTT    | 20          | 60  |              |
| <i>SfGSTe11</i> | F      | GACACCTACGGAAGGGATGA    | 20          | 60  | 234          |
|                 | R      | ATCCAAGGCGATGAACTTTG    | 20          | 60  |              |

|                 |   |                        |    |    |     |
|-----------------|---|------------------------|----|----|-----|
| <i>SfGSTe12</i> | F | AGTCGGGGTGAGTGAGACAC   | 20 | 60 | 196 |
|                 | R | ATTGCCGTACATTGGATGGT   | 20 | 60 |     |
| <i>SfGSTe13</i> | F | GCTGACACCTACGGAAAGGA   | 20 | 60 | 249 |
|                 | R | AATGGTGACAAGGTCCAAGG   | 20 | 60 |     |
| <i>SfGSTe14</i> | F | AAGCCATTGGTTTTGTGGAG   | 20 | 60 | 175 |
|                 | R | TGAAACACTGGGACCAACAA   | 20 | 60 |     |
| <i>SfGSTe15</i> | F | AGAAGCCATTGGTTTTGTGG   | 20 | 60 | 162 |
|                 | R | TCTAACCAGGCAACCGTCTT   | 20 | 60 |     |
| <i>SfGSTe16</i> | F | AGTCGGGGTGAGTGAGACAC   | 20 | 60 | 196 |
|                 | R | ATTGCCGTACATTGGATGGT   | 20 | 60 |     |
| <i>SfGSTe17</i> | F | CACAAGATGGCGCCGATAC    | 19 | 60 | 102 |
|                 | R | GTCCCTGACTTCGAGTTCCA   | 20 | 60 |     |
| <i>SfGSTo1</i>  | F | TGGACATGAACCCCTATGGT   | 20 | 60 | 193 |
|                 | R | CAAATCACCACGCTCTCAAA   | 20 | 60 |     |
| <i>SfGSTo2</i>  | F | AGCGACCTCTCCTCCCTAAG   | 20 | 60 | 242 |
|                 | R | CCAGGGCCAGATCATGTAGT   | 20 | 60 |     |
| <i>SfGSTs1</i>  | F | GCCGCTGTGTACACCATCTA   | 20 | 60 | 195 |
|                 | R | GACGAACTCCACCCAGGATA   | 20 | 60 |     |
| <i>SfGSTs2</i>  | F | ATCGACCAGAACGTTGACCT   | 20 | 60 | 170 |
|                 | R | ACATGGCCGTTGTTCTTGAC   | 20 | 60 |     |
| <i>SfGSTs4</i>  | F | CATAGAGAGCATCGTATTCACC | 22 | 60 | 202 |
|                 | R | TACAAAGTCACCCCAGGAG    | 19 | 60 |     |
| <i>SfGSTs5</i>  | F | TGGTTACGTCGCTTTAGGAAA  | 21 | 60 | 112 |
|                 | R | GGCTGGGTACTTCTCTCCAA   | 20 | 60 |     |
| <i>SfGSTs6</i>  | F | CTGAAGGGCAAGACTGCGTA   | 20 | 60 | 201 |

|                |   |                      |    |    |     |
|----------------|---|----------------------|----|----|-----|
|                | R | ACAATGTGTGCGCTTTGGTC | 20 | 60 |     |
| <i>SfGSTm1</i> | F | CACAGTGAACAAGCGACTCG | 20 | 60 | 203 |
|                | R | AAGCCATGCCCAGAACTTTG | 20 | 60 |     |
| <i>SfGSTm2</i> | F | TCAACCGAGCACAAACAGAG | 20 | 60 | 161 |
|                | R | GGCTCGGGTAGTACCTGTCA | 20 | 60 |     |
| <i>SfGSTm3</i> | F | TCCAGTGCGCTGTGATTTCT | 20 | 60 | 175 |
|                | R | CAGTTGCCTACCACGACAGT | 20 | 60 |     |
| EF1 $\alpha$   | F | TGGTGACTCCAAGAACAACC | 20 | 60 | 175 |
|                | R | CGGTGGATTTACCAGTACGA | 20 | 60 |     |
| RPS18          | F | GACTGGTTCCTCAACAGGCA | 20 | 60 | 143 |
|                | R | CCCCAGTAGTGACGCATACC | 20 | 60 |     |
